# Supplementary material for: Diarrhoea in the critically ill is common, associated with poor outcome, and rarely due to Clostridium difficile
Source: PubMed Central journal article supplement (PMC4837391; doi:10.1038/srep24691), 2016-04-20

**Diarrhoea in the critically ill is common, associated with poor  
outcome, and rarely due to *Clostridium difficile***

**Nikhil Tirlapur<sup>1\*</sup>, Zudin A. Puthucheary<sup>2,3,4</sup>, Jackie A. Cooper<sup>5</sup>, Julie Sanders<sup>6</sup>,  
Pietro G. Coen<sup>7</sup>, S. Ramani Moonesinghe<sup>8</sup>, A. Peter Wilson<sup>9</sup>, Michael G.  
Mythen<sup>10</sup>, Hugh E. Montgomery<sup>3,11</sup>**

<sup>1</sup>Section of Anaesthetics, Pain Medicine & Intensive Care, Faculty of Medicine, Imperial College  
London, 369 Fulham Road, London, SW10 9NH, UK

<sup>2</sup>Critical Care, University College London Hospitals NHS Foundation Trust, London, UK

<sup>3</sup>Institute for Sport Exercise and Health, University College London, London, UK

<sup>4</sup>Respiratory and Critical Care Medicine, University Medicine Cluster, National University Health  
System, Singapore

<sup>5</sup>Centre for Cardiovascular Genetics, Institute of Cardiovascular Science, University College London,  
London, UK

<sup>6</sup>St Bartholomew's Hospital, Barts Health NHS Trust, London, UK

<sup>7</sup>Infection Control Office, University College London Hospitals NHS Foundation Trust, London, UK

<sup>8</sup>University College London Hospitals NHS Foundation Trust / University College London National  
Institute for Health Research Surgical Outcomes Research Centre, London, UK

<sup>9</sup>Microbiology & Virology, University College London Hospitals NHS Foundation Trust, London, UK

<sup>10</sup>University College London Hospitals NHS Foundation Trust / University College London National  
Institute for Health Research Biomedical Research Centre, London, UK

<sup>11</sup>Critical Care, Whittington Hospital, University College London, London, UK

**Supplementary Table S1.** Relationship between type of surgery (gastrointestinal vs non-gastrointestinal) and diarrhoea.

|                                                     | <b>Admissions with<br/>Diarrhoea<sup>a</sup></b><br>(N = 1207) | <b>Admissions with No<br/>Diarrhoea<sup>a</sup></b><br>(N = 8124) | <b>P-value</b> |
|-----------------------------------------------------|----------------------------------------------------------------|-------------------------------------------------------------------|----------------|
| <b>Referring Specialty</b>                          |                                                                |                                                                   |                |
| Medical                                             | 726 (60.1%)                                                    | 2358 (29.0%)                                                      |                |
| Surgical                                            | 481 (39.9%)                                                    | 5766 (71.0%)                                                      |                |
| GI surgery                                          | 212 (17.6%)                                                    | 2533 (31.2%)                                                      | 0.96           |
| Non-GI surgery                                      | 269 (22.3%)                                                    | 3233 (39.8%)                                                      |                |
| <b>Reason for Intensive Care Unit<br/>admission</b> |                                                                |                                                                   |                |
| Operative intervention                              | 228 (18.9%)                                                    | 4735 (58.3%)                                                      |                |
| GI surgery                                          | 107 (8.9%)                                                     | 2155 (26.5%)                                                      | 0.68           |
| Non-GI surgery                                      | 121 (10.0%)                                                    | 2580 (31.8%)                                                      |                |

<sup>a</sup>Data shown as N (%) unless stated otherwise.

**Supplementary Table S2.** Reasons for intensive care unit admission in patients admitted following gastrointestinal surgery and suffering diarrhoea.

| <b>GI Surgery Admissions with Diarrhoea<sup>a</sup></b> |             |
|---------------------------------------------------------|-------------|
| <b>(N = 212)</b>                                        |             |
| <b>Reason for ICU Admission</b>                         |             |
| Operative intervention                                  | 102 (48.1%) |
| Cardiovascular                                          | 13 (6.1%)   |
| Respiratory failure                                     | 25 (11.8%)  |
| Haemorrhage                                             | 16 (7.5%)   |
| Sepsis                                                  | 49 (23.1%)  |
| Renal failure                                           | 1 (0.5%)    |
| Neurological                                            | 1 (0.5%)    |
| Haematological                                          | 0 (0.0%)    |
| Liver failure                                           | 2 (0.9%)    |
| Other                                                   | 3 (1.4%)    |

<sup>a</sup>Data shown as N (%) unless stated otherwise.

**Supplementary Table S3.** Reasons for operative intervention in patients suffering diarrhoea following admission to the intensive care unit due to operative intervention after gastrointestinal surgery.

| <b>GI Surgery Admissions with Diarrhoea<sup>a</sup></b> |            |
|---------------------------------------------------------|------------|
| <b>(N = 102)</b>                                        |            |
| <b>Reason for Operative Intervention</b>                |            |
| Emergency                                               | 55 (53.9%) |
| Elective                                                | 47 (46.1%) |
| Tumour                                                  | 27 (26.5%) |
| Fistula                                                 | 10 (9.8%)  |
| Congenital malformation                                 | 4 (3.9%)   |
| Hernia                                                  | 2 (2.0%)   |
| Bariatric                                               | 2 (2.0%)   |
| Inflammatory bowel disease                              | 2 (2.0%)   |

<sup>a</sup>Data shown as N (%) unless stated otherwise.

**Supplementary Table S4.** Study population results per year from 2006 to 2010.

|                                                       | <b>2006</b><br>(N=1551) | <b>2007</b><br>(N=1620) | <b>2008</b><br>(N=1837) | <b>2009</b><br>(N=2098) | <b>2010</b><br>(N=2225) |
|-------------------------------------------------------|-------------------------|-------------------------|-------------------------|-------------------------|-------------------------|
| <b>Admissions Suffering Diarrhoea During ICU Stay</b> | 214                     | 262                     | 253                     | 238                     | 240                     |
| <b>Prevalence of Diarrhoea</b>                        | <b>13.8%</b>            | <b>16.2%</b>            | <b>13.8%</b>            | <b>11.3%</b>            | <b>10.8%</b>            |
| <b>Admissions with <i>C Difficile</i></b>             | 23                      | 16                      | 7                       | 19                      | 32                      |
| <b>Prevalence of <i>C Difficile</i></b>               | <b>1.5%</b>             | <b>1.0%</b>             | <b>0.4%</b>             | <b>0.9%</b>             | <b>1.4%</b>             |
| <b>Mean Age Years [SD]</b>                            | 57.8 [17.9]             | 58.6 [17.9]             | 58.5 [17.7]             | 58.6 [17.8]             | 59.3 [17.3]             |
| <b>Male Sex</b>                                       | 917 (59.1%)             | 935 (57.7%)             | 994 (54.1%)             | 1088 (51.9%)            | 1201 (54.0%)            |
| <b>Referring Specialty</b>                            |                         |                         |                         |                         |                         |
| Medical                                               | 614 (39.6%)             | 625 (38.6%)             | 653 (35.5%)             | 626 (29.8%)             | 566 (25.4%)             |
| Surgical                                              | 937 (60.4%)             | 995 (61.4%)             | 1184 (64.5%)            | 1427 (70.2%)            | 1659 (74.6%)            |
| <b>Median APACHE II [IQR]</b>                         | 18 [13-23]              | 17 [12-23]              | 16 [12-22]              | 17 [12-22]              | 14 [7-20]               |
| <b>Cause for ICU Admission (no [%])</b>               |                         |                         |                         |                         |                         |
| Cardiovascular                                        | 106 (6.8%)              | 121 (7.5%)              | 117 (6.4%)              | 131 (6.2%)              | 121 (5.4%)              |
| Respiratory Failure                                   | 219 (14.1%)             | 223 (13.8%)             | 294 (16.0%)             | 263 (12.5%)             | 230 (10.3%)             |
| Haemorrhage                                           | 132 (8.5%)              | 129 (8.0%)              | 120 (6.5%)              | 130 (6.2%)              | 126 (5.7%)              |
| Sepsis                                                | 151 (9.7%)              | 135 (8.3%)              | 128 (7.0%)              | 106 (5.1%)              | 135 (6.1%)              |
| Renal Failure                                         | 41 (2.6%)               | 37 (2.3%)               | 52 (2.8%)               | 44 (2.1%)               | 31 (1.4%)               |
| Operative intervention                                | 667 (43.0%)             | 778 (48.0%)             | 935 (50.9%)             | 1200 (57.2%)            | 1383 (62.2%)            |
| <i>GI Surgery</i>                                     | 233 (15.0%)             | 361 (22.3%)             | 509 (27.7%)             | 597 (28.5%)             | 562 (25.3%)             |
| <i>Non-GI Surgery</i>                                 | 434 (28.0%)             | 417 (25.7%)             | 426 (23.2%)             | 603 (28.7%)             | 821 (36.9%)             |
| Neurological                                          | 149 (9.6%)              | 118 (7.3%)              | 92 (5.0%)               | 138 (6.6%)              | 128 (5.8%)              |
| Haematological                                        | 23 (1.5%)               | 21 (1.3%)               | 35 (1.9%)               | 29 (1.4%)               | 31 (1.4%)               |
| Liver Failure                                         | 16 (1.0%)               | 11 (0.7%)               | 18 (1.0%)               | 20 (1.0%)               | 12 (0.5%)               |
| Other                                                 | 47 (3.0%)               | 47 (2.9%)               | 46 (2.5%)               | 37 (1.8%)               | 28 (1.3%)               |
| <b>Median ICU LOS Days [IQR]</b>                      | 1.8 [0.9-4.9]           | 2.2 [1.0-5.4]           | 2.0 [1.0-4.8]           | 1.8 [0.9-4.0]           | 1.8 [1.0-3.9]           |
| <b>ICU Mortality (no [%])</b>                         | 224 (14.4%)             | 210 (13.0%)             | 175 (9.5%)              | 188 (9.0%)              | 173 (7.8%)              |

**Supplementary Figure I.** Prevalence of diarrhoea over study period unadjusted vs adjusted for reason for ICU admission and APACHE-II score.

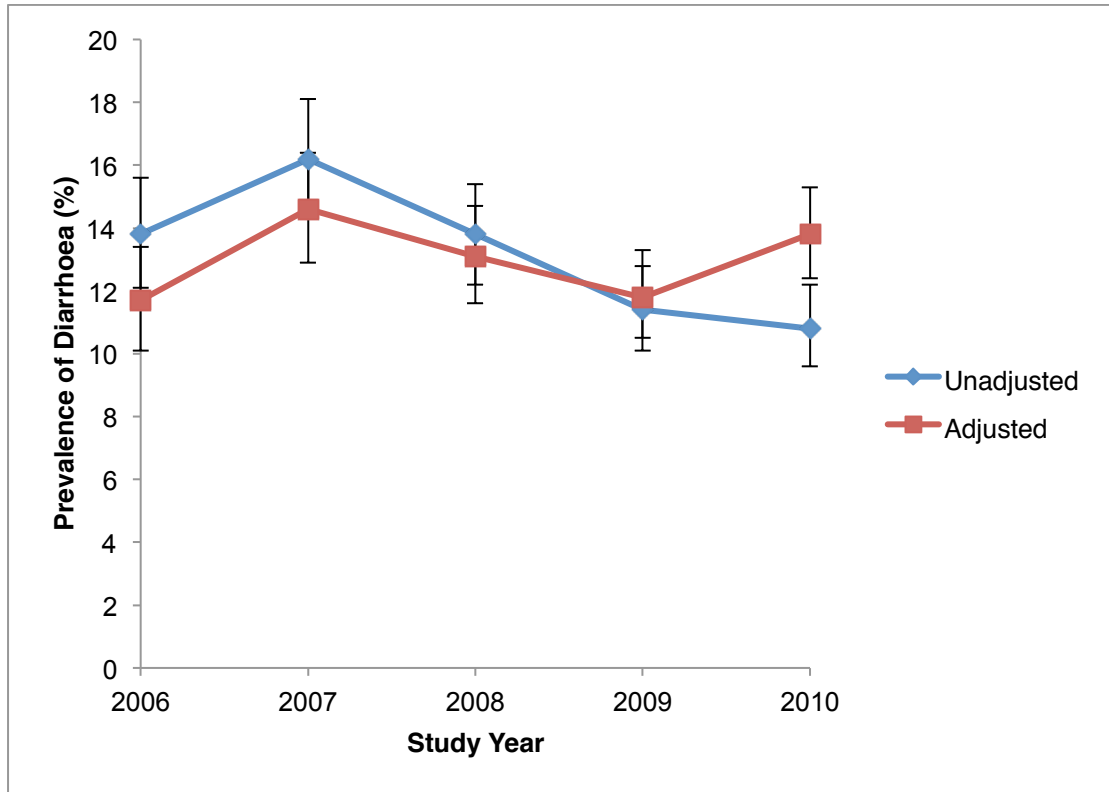

Supplement: srep24691-s1.pdf [file srep24691-s1.pdf]
